# Supplementary material for: Health Literacy and Its Related Determinants in Migrant Health Workers and Migrant Health Volunteers: A Case Study of Thailand, 2019
Source: MDPI journal article supplement (doi:10.3390/ijerph17062105), 2020-03-22
Supplement: s1 [file s1]

# Supplementary Materials

## Supplementary material 1

### Formula of sample size calculation

$$n = 2[Z_{\alpha/2} + Z_{\beta}]^2 \sigma^2 / d^2$$

The difference of mean score in two groups (d) equals to 3 [1]

The standard deviation in unexposed group ( $\sigma$ ) equals to 5.23 [1]

$Z_{\alpha/2}$  equals to 1.96 at 95% of confidence interval.

$Z_{\beta}$  equals to 0.84 at 80% of discrimination power.

When the formula was calculated, there were 48 samples for each province. Considering a possible 20% non-response rate, 60 samples were selected in each province or 120 for both provinces. Additionally, 120 general migrants in that area were recruited by using 1:1 matching strategy to compare as baseline data.

## Supplementary material 2

**Table S1.** Health literacy questionnaire.

| Question                                                                                                                | Answer                              |                                |                         |
|-------------------------------------------------------------------------------------------------------------------------|-------------------------------------|--------------------------------|-------------------------|
|                                                                                                                         | Cannot Do<br>/Disagree<br>(Score 1) | Difficult/Neutral<br>(Score 2) | Easy/Agree<br>(Score 3) |
| 1. I can find information about health problems or concerns                                                             |                                     |                                |                         |
| 2. I can find health information from different places e.g., health personals, media, etc.                              |                                     |                                |                         |
| 3. I always check health information in order to keep myself in good health                                             |                                     |                                |                         |
| 4. I have enough health information to deal with my health problems                                                     |                                     |                                |                         |
| 5. After I have read health information in my native language, I can understand all information                         |                                     |                                |                         |
| 6. After I have heard health information in my native language, I can understand all information                        |                                     |                                |                         |
| 7. After getting health information, I try to understand the information                                                |                                     |                                |                         |
| 8. After receiving health information, I always compare health information from different sources                       |                                     |                                |                         |
| 9. When I see new information about health, I always check whether the sources are reliable before I believe or follow. |                                     |                                |                         |
| 10. I know how to find reliable sources of health information before I believe or follow.                               |                                     |                                |                         |
| 11. You have a competency to make a right decision after receiving health information                                   |                                     |                                |                         |
| 12. You have a competency to share health information to others                                                         |                                     |                                |                         |

### Supplementary material 3

**Table S2.** The results of bivariate analysis.

| Variables                      | P-value  |
|--------------------------------|----------|
| Province                       | 0.0520   |
| Migrant type                   | <0.001 * |
| Sex                            | 0.9983   |
| Age                            | 0.5201   |
| Married status                 | 0.0532   |
| Income                         | 0.0605   |
| Education level                | <0.001 * |
| Duration of living in Thailand | 0.0021 * |
| Myanmar listening skill        | 0.3615   |
| Myanmar reading skill          | 0.5161   |
| Thai listening skill           | <0.001 * |
| Thai reading skill             | <0.001 * |
| Affiliation                    | <0.001 * |

\* P-value < 0.05.

### Reference

1. Intarakamhang, U. *Creating and Developing of Thailand Health Literacy Scales*; Behavioral Science Research Institute, Srinakharinwirot University: Bangkok, Thailand, 2017.
